# Supplementary material
Source: PubMed Central journal article supplement (PMC2860881)
Supplement: NIHMS183936-supplement-01.pdf [file NIHMS183936-supplement-01.pdf]

**Supplemental Table.** This table provides a description of each target gene investigated in RT-PCR analyses, along with a Qiagen catalog number that can be used to obtain further details for each amplified transcript ([www1.qiagen.com](http://www1.qiagen.com)). The last two entries list information for genes used as an internal reference in RT-PCR analyses (*Rn18s* and *Gapdh*).

| Gene Symbol   | Qiagen Cat. No. | Description                                                     |
|---------------|-----------------|-----------------------------------------------------------------|
| <i>Igfbp1</i> | QT00114716      | insulin-like growth factor binding protein 1                    |
| <i>Igfbp2</i> | QT00269542      | insulin-like growth factor binding protein 2                    |
| <i>Igfbp3</i> | QT00493332      | insulin-like growth factor binding protein 3                    |
| <i>Igfbp4</i> | QT00148498      | insulin-like growth factor binding protein 4                    |
| <i>Igfbp5</i> | QT01048159      | insulin-like growth factor binding protein 5                    |
| <i>Igfbp6</i> | QT00322735      | insulin-like growth factor binding protein 6                    |
| <i>Igfbp7</i> | QT00140805      | insulin-like growth factor binding protein 7                    |
| <i>Igf1</i>   | QT00154469      | insulin-like growth factor 1                                    |
| <i>Igf1r</i>  | QT00155351      | insulin-like growth factor 1 receptor                           |
| <i>Igf2</i>   | QT00109879      | insulin-like growth factor 2                                    |
| <i>Igfals</i> | QT00247002      | insulin-like growth factor binding protein, acid labile subunit |
| <i>Pten</i>   | QT00141568      | phosphatase and tensin homolog                                  |
| <i>Irs1</i>   | QT00251657      | insulin receptor substrate 1                                    |
| <i>Irs2</i>   | QT00286097      | insulin receptor substrate 2                                    |
| <i>Ccnd1</i>  | QT00154595      | cyclin D1                                                       |
| <i>Hbegf</i>  | QT00158452      | heparin-binding EGF-like growth factor                          |
| <i>Mt1</i>    | QT00265902      | metallothionein 1                                               |
| <i>Mt2</i>    | QT00264278      | metallothionein 2                                               |

|                |            |                                                       |
|----------------|------------|-------------------------------------------------------|
| <i>Lifr</i>    | QT00140980 | leukemia inhibitory factor receptor                   |
| <i>Fmo3</i>    | QT00104104 | flavin containing monooxygenase 3                     |
| <i>Sgk1</i>    | QT00112882 | serum/glucocorticoid regulated kinase 1               |
| <i>Socs2</i>   | QT00248269 | suppressor of cytokine signaling 2                    |
| <i>Egfr</i>    | QT00101584 | epidermal growth factor receptor                      |
| <i>Keg1</i>    | QT00142219 | kidney expressed gene 1                               |
| <i>Mup3</i>    | QT01780128 | major urinary protein 3                               |
| <i>Sult2a2</i> | QT01042559 | RIKEN cDNA C730007P19 gene                            |
| <i>Spink3</i>  | QT00098833 | serine peptidase inhibitor, Kazal type 3              |
| <i>Hao3</i>    | QT10037008 | hydroxyacid oxidase 2                                 |
| <i>Cyp2a4</i>  | QT01760416 | cytochrome P450, family 2, subfamily a, polypeptide 4 |
| <i>Rn18s</i>   | QT01036875 | 18S ribosomal RNA                                     |
| <i>Gapdh</i>   | QT01658692 | glyceraldehyde-3-phosphate dehydrogenase              |
